# Supplementary material
Source: PubMed Central journal article supplement (PMC7430001)

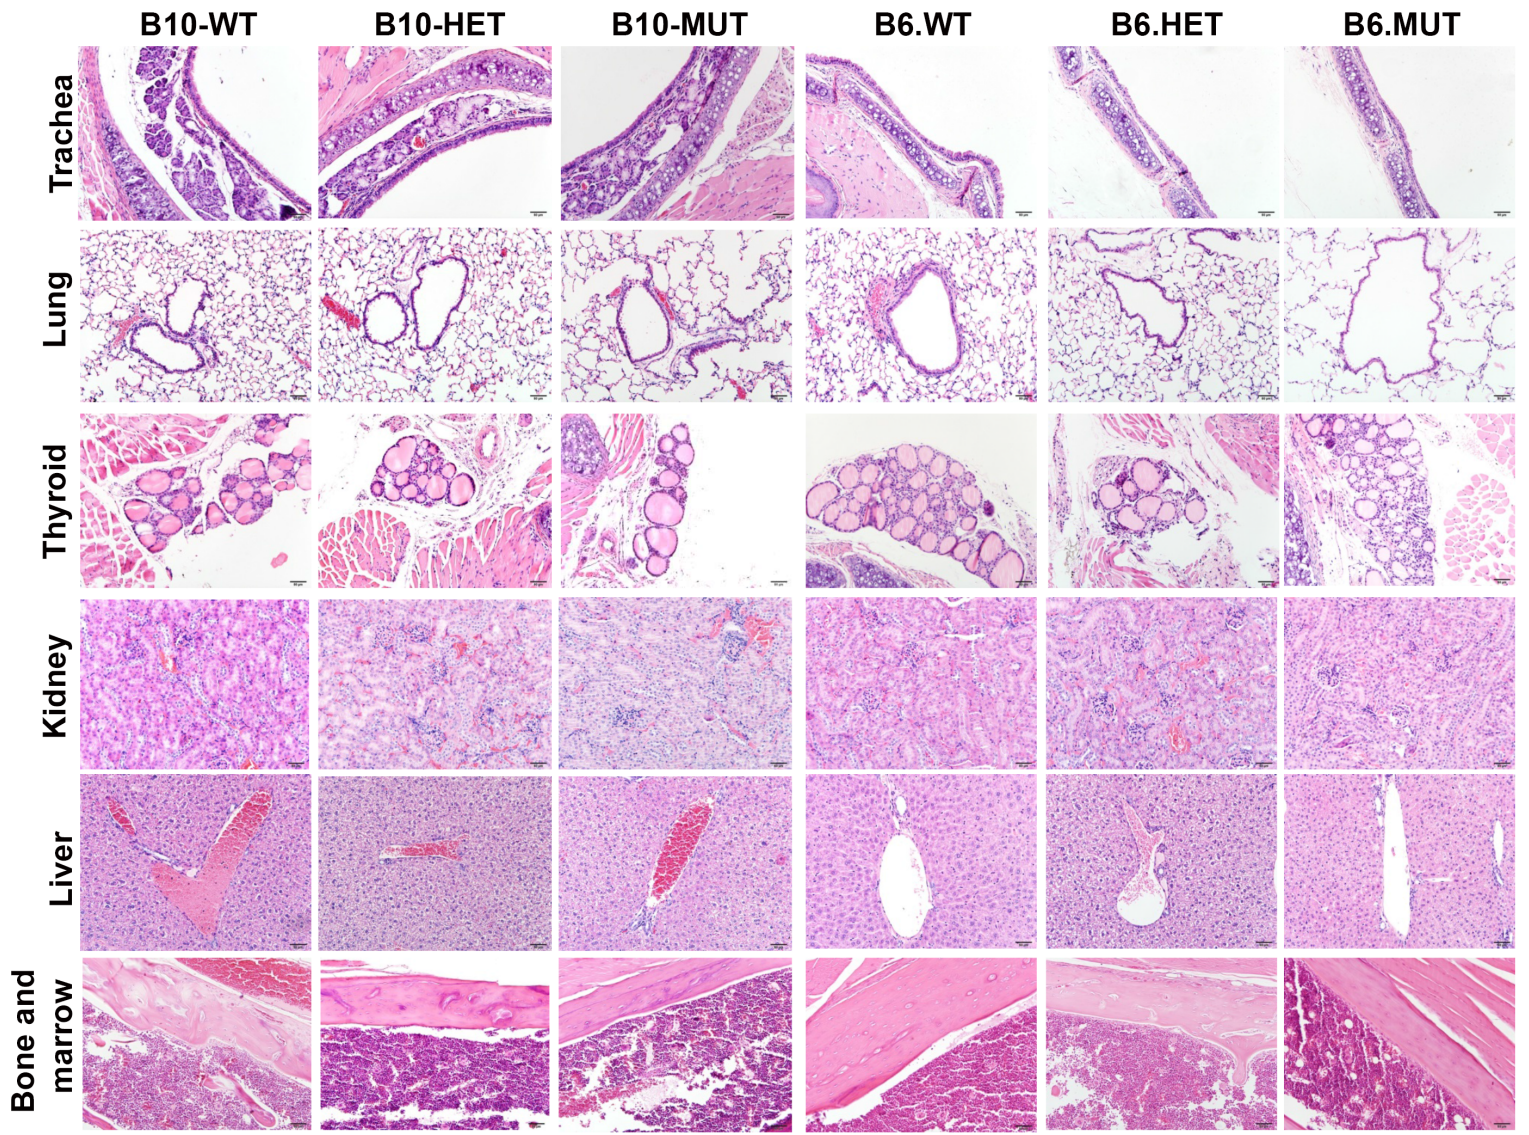

Supplement: NIHMS1549741-supplement-2.pdf [file NIHMS1549741-supplement-2.pdf]

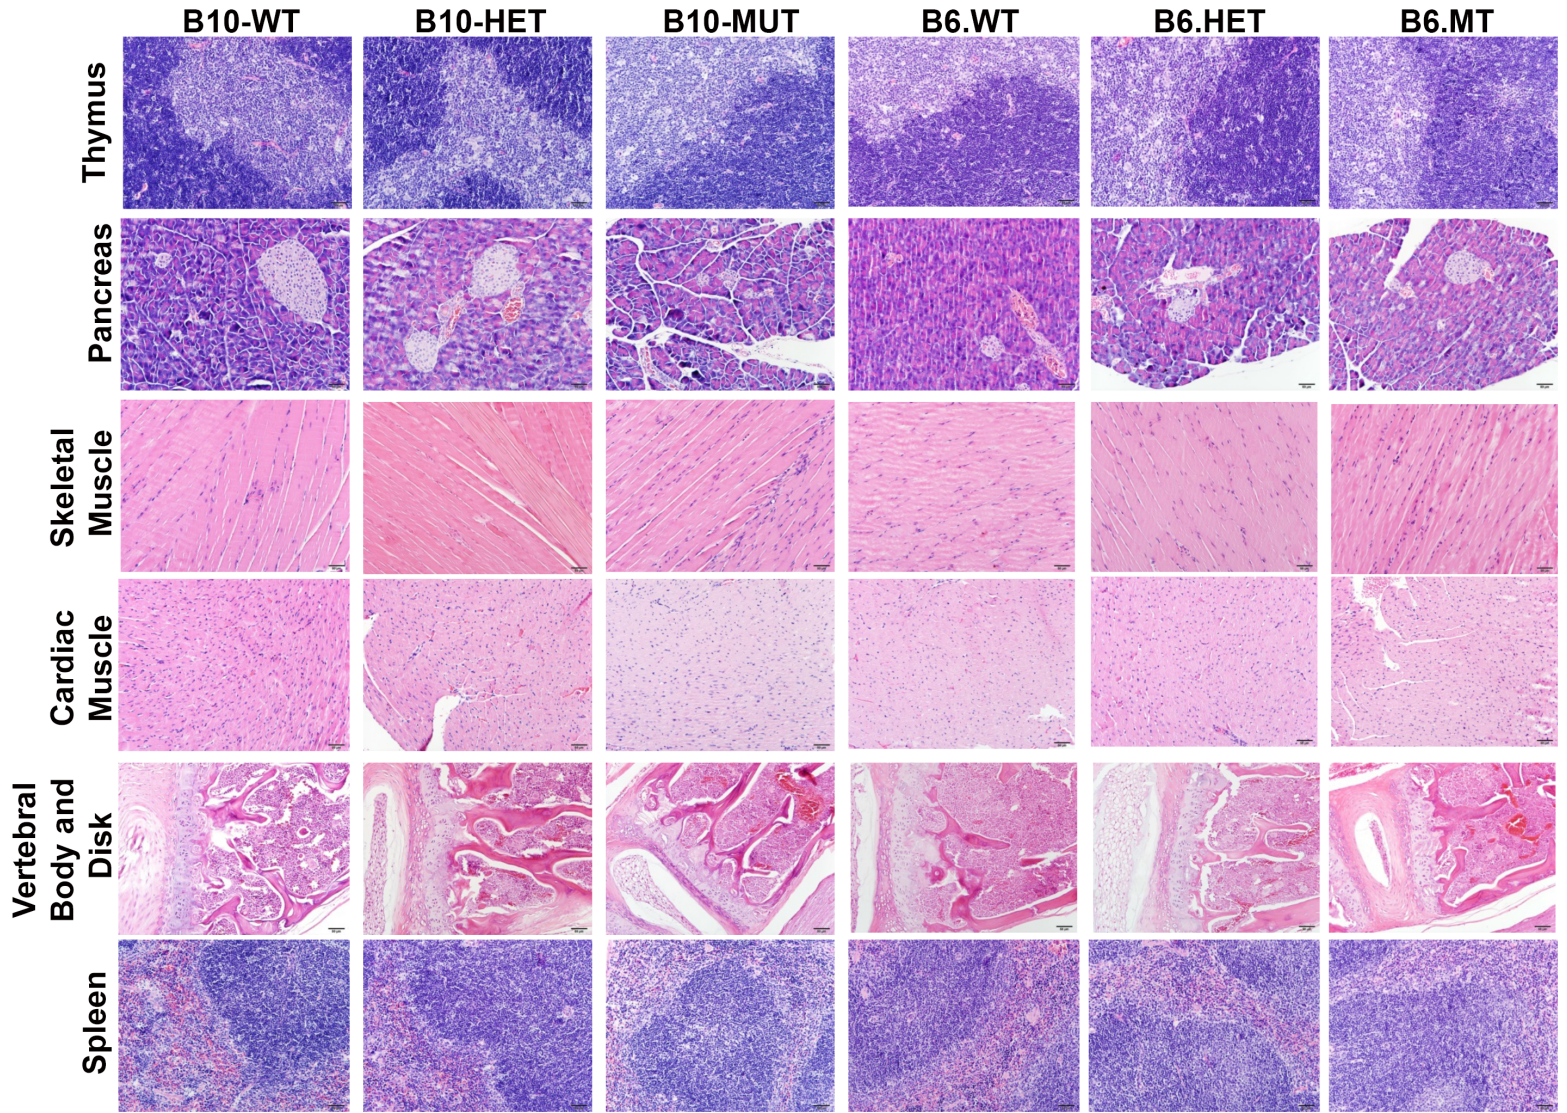

Supplement: NIHMS1549741-supplement-3.pdf [file NIHMS1549741-supplement-3.pdf]

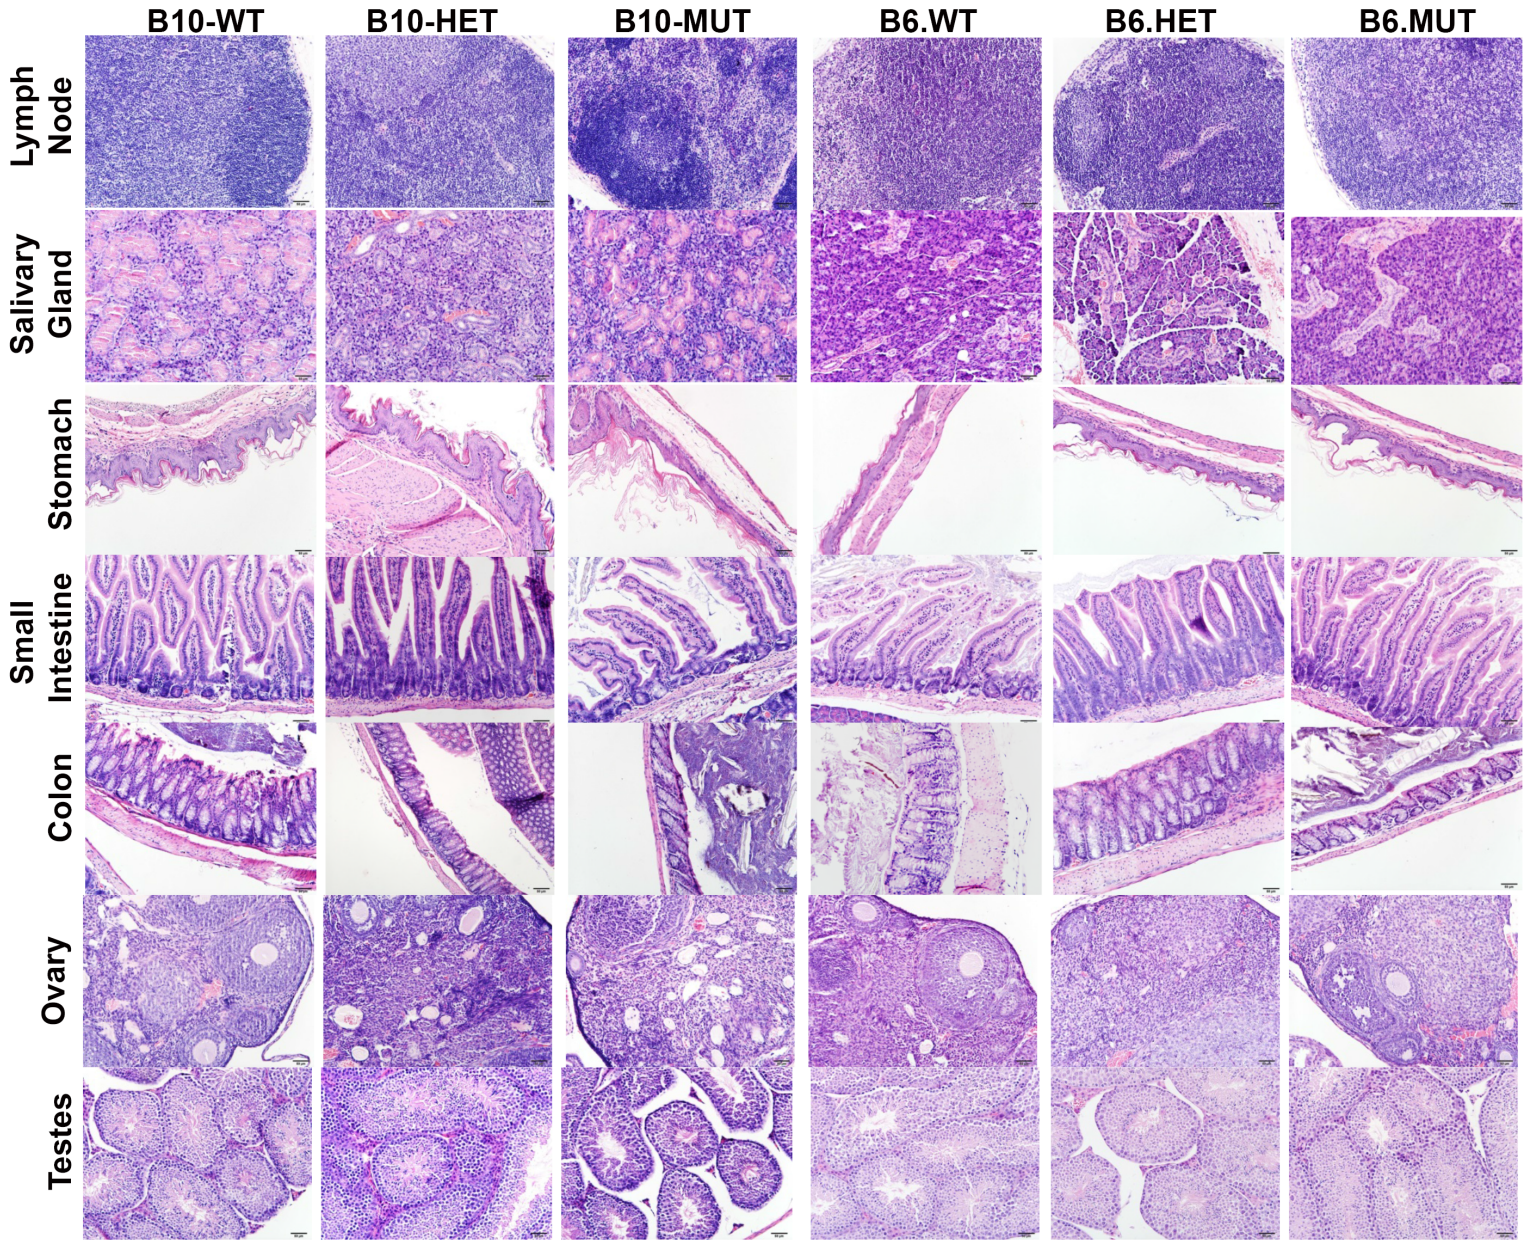

Supplement: NIHMS1549741-supplement-4.pdf [file NIHMS1549741-supplement-4.pdf]
